# Supplementary material for: Dietary Vitamin D Mitigates Coronavirus-Induced Lung Inflammation and Damage in Mice
Source: MDPI journal article supplement (doi:10.3390/v15122434), 2023-12-15
Supplement: s1 [file s1]

## Supplementary files

### Figures

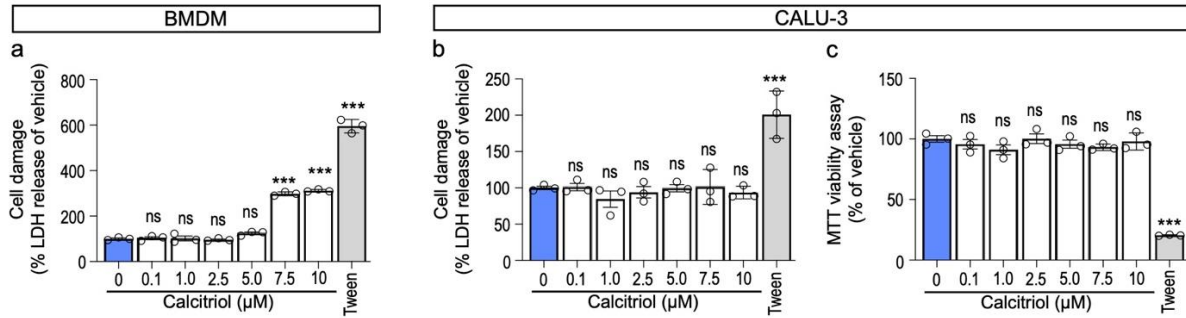

**Figure S1: Calcitriol is cytotoxic to uninfected BMDMs at increasing concentrations, but not to Calu-3 cells.** Calcitriol cytotoxicity was determined by LDH release/activity in the supernatant samples after 24h (a) or 48h (b) of treatment. Additionally, Calu-3 cell viability following calcitriol treatment was assessed by the MTT assay. Differences among vehicle and treated groups were evaluated using one-way ANOVA followed by Dunnett's post-hoc test. ns: non-statistically significant ( $p > 0.05$ ). \*\*\* $p \leq 0.001$ .  $n = 3$  independent experiments.

## Raw data\_Figure 1

| MHV-3 Titer (Log10 p.f.u/mL) - Figure 1b                          |                 |               |               |               |               |              |
|-------------------------------------------------------------------|-----------------|---------------|---------------|---------------|---------------|--------------|
| Replicates                                                        | Calcitriol (μM) |               |               |               |               |              |
|                                                                   | 0               | 0.1           | 1.0           | 2.5           | 5.0           |              |
| #1                                                                | 7.778           | 7.146         | 7.23          | 7.146         | 5.362         |              |
| #2                                                                | 7.301           | 7.114         | 7.279         | 6.778         | 5.398         |              |
| #3                                                                | 7.699           | 7.376         | 6.954         | 7.114         | 5.699         |              |
| Mean ± SEM                                                        | 7.593 ± 0.15    | 7.212 ± 0.08  | 7.154 ± 0.10  | 7.013 ± 0.12  | 5.486 ± 0.11  |              |
| One-way ANOVA plus Dunnet's (compared to 0 μM)                    | X               | p=0.1146      | p=0.0642      | p=0.0152      | p<0.0001      |              |
| MHV-3-induced LDH release (% of uninfected control) - Figure 1c   |                 |               |               |               |               |              |
| Replicates                                                        | Calcitriol (μM) |               |               |               |               |              |
|                                                                   | 0               | 0.1           | 1.0           | 2.5           | 5.0           |              |
| #1                                                                | 312.67          | 303.03        | 277.81        | 199.66        | 125.34        |              |
| #2                                                                | 280.24          | 263.37        | 307.94        | 262.75        | 121.82        |              |
| #3                                                                | 275.08          | 240.67        | 227.54        | 210.23        | 141.23        |              |
| Mean ± SEM                                                        | 289.3 ± 11.76   | 269.0 ± 18.22 | 271.1 ± 23.45 | 224.2 ± 19.51 | 129.5 ± 5.97  |              |
| One-way ANOVA plus Dunnet's (compared to 0 μM)                    | X               | 0.8116        | 0.8588        | 0.0664        | 0.0002        |              |
| MHV-A59 Titer (Log10 p.f.u/mL) - Figure 1d                        |                 |               |               |               |               |              |
| Replicates                                                        | Calcitriol (μM) |               |               |               |               |              |
|                                                                   | 0               | 0.1           | 1.0           | 2.5           | 5.0           |              |
| #1                                                                | 7.462           | 7.146         | 7.176         | 7.724         | 6.114         |              |
| #2                                                                | 6.845           | 7.431         | 7.398         | 7.505         | 5.845         |              |
| #3                                                                | 7.633           | 7.376         | 7.415         | 7.544         | 6.176         |              |
| Mean ± SEM                                                        | 7.313 ± 0.24    | 7.318 ± 0.15  | 7.330 ± 0.08  | 7.591 ± 0.07  | 6.045 ± 0.10  |              |
| One-way ANOVA plus Dunnet's (compared to 0 μM)                    | X               | p>0.9999      | p=0.9999      | p=0.4148      | p=0.0002      |              |
| MHV-A59-induced LDH release (% of uninfected control) - Figure 1e |                 |               |               |               |               |              |
| Replicates                                                        | Calcitriol (μM) |               |               |               |               |              |
|                                                                   | 0               | 0.1           | 1             | 2.5           | 5             |              |
| #1                                                                | 276.58          | 267.90        | 261.77        | 273.96        | 160.54        |              |
| #2                                                                | 294.57          | 285.04        | 263.40        | 300.30        | 144.93        |              |
| #3                                                                | 283.65          | 248.88        | 273.72        | 328.81        | 124.73        |              |
| Mean ± SEM                                                        | 284.9 ± 5.233   | 267.3 ± 10.44 | 266.3 ± 3.741 | 301.0 ± 15.84 | 143.4 ± 10.37 |              |
| One-way ANOVA plus Dunnet's (compared to 0 μM)                    | X               | 0.5674        | 0.5253        | 0.6372        | <0.0001       |              |
| SARS-CoV-2 Titer (Log10 p.f.u/mL) - Figure 1f                     |                 |               |               |               |               |              |
| Replicates                                                        | Calcitriol (μM) |               |               |               |               |              |
|                                                                   | 0               | 1.0           | 2.5           | 5.0           | 7.5           | 10           |
| #1                                                                | 6.20            | 6.00          | 5.51          | 4.85          | 3.90          | 4.43         |
| #2                                                                | 5.95            | 5.26          | 4.60          | 5.18          | 4.62          | 3.60         |
| #3                                                                | 6.04            | 5.38          | 5.20          | 4.18          | 4.38          | 3.32         |
| Mean ± SEM                                                        | 6.063 ± 0.07    | 5.547 ± 0.23  | 5.103 ± 0.27  | 4.737 ± 0.29  | 4.300 ± 0.21  | 3.783 ± 0.33 |
| One-way ANOVA plus Dunnet's (compared to 0 μM)                    | X               | p=0.4774      | p=0.0677      | p=0.0108      | p=0.0013      | p=0.0002     |

| SARS-CoV-2 Titer (Log10 p.f.u/mL) - Figure 1g          |                       |                   |                   |                   |                   |                   |
|--------------------------------------------------------|-----------------------|-------------------|-------------------|-------------------|-------------------|-------------------|
| Replicates                                             | Calcitriol ( $\mu$ M) |                   |                   |                   |                   |                   |
|                                                        | 0                     | 1.0               | 2.5               | 5.0               | 7.5               | 10                |
| #1                                                     | 220.22                | 143.96            | 182.76            | 196.62            | 161.57            | 176.34            |
| #2                                                     | 196.38                | 209.48            | 184.25            | 183.18            | 255.46            | 217.89            |
| #3                                                     | 208.62                | 193.59            | 216.60            | 217.04            | 190.75            | 206.86            |
| Mean $\pm$ SEM                                         | 208.4 $\pm$ 6.881     | 182.3 $\pm$ 19.73 | 194.5 $\pm$ 11.04 | 198.9 $\pm$ 9.841 | 202.6 $\pm$ 27.74 | 200.4 $\pm$ 12.43 |
| One-way ANOVA plus Dunnet's<br>(compared to 0 $\mu$ M) | X                     | p=0.6884          | p=0.9578          | p=0.9916          | p=0.9987          | p=0.9958          |

## Raw data\_Figure 2

Figure 2b

| Body weight change (Mean % ± S.E.M % from baseline) |                     |                     | Two-way ANOVA n=10                         |                    |                        |
|-----------------------------------------------------|---------------------|---------------------|--------------------------------------------|--------------------|------------------------|
| dpi                                                 | STD_MHV             | Vit.D_MHV           | ANOVA Table                                | F (DFn, DFd)       | P value                |
| 0                                                   | 100.0 ± 0.000, n=10 | 100.0 ± 0.000, n=10 | dpi (0 to 6 dpi)                           | F (6, 120) = 1.469 | P=0.1944               |
| 1                                                   | 99.52 ± 1.925, n=10 | 99.21 ± 0.488, n=10 | diet factor                                | F (6, 120) = 47.38 | P<0.0001               |
| 2                                                   | 95.30 ± 1.812, n=10 | 97.58 ± 1.185, n=10 | dpi x diet factor                          | F (1, 120) = 14.02 | P=0.0003               |
| 3                                                   | 87.64 ± 2.467, n=10 | 94.74 ± 2.493, n=10 | Multiple comparisons - Fischer LSD posthoc |                    |                        |
| 4                                                   | 82.17 ± 2.405, n=10 | 88.61 ± 2.553, n=10 | STD_MHV - Vit.D_MHV                        | Sense              | FDR Individual P Value |
| 5                                                   | 74.96 ± 2.398, n=10 | 82.86 ± 2.813, n=9  | 0 dpi                                      | A-B                | 0.750 >0.9999          |
| 6                                                   | 72.00 ± 2.000, n=7  | 76.89 ± 2.634, n=8  | 1 dpi                                      | A-B                | 0.750 0.9114           |
| 7                                                   |                     | 81.44 ± 8.370, n=7  | 2 dpi                                      | A-B                | 0.4343 0.4137          |
| 8                                                   |                     | 82.58 ± 6.315, n=4  | 3 dpi                                      | A-B                | 0.0312 0.0119          |
| 9                                                   |                     | 88.86 ± 2.865, n=4  | 4 dpi                                      | A-B                | 0.0388 0.0222          |
| 10                                                  |                     | 90.61 ± 3.370, n=3  | 5 dpi                                      | A-B                | 0.0312 0.0066          |
| 12                                                  |                     | 93.39 ± 1.985, n=3  | 6 dpi                                      | A-B                | 0.172 0.1311           |
| 14                                                  |                     | 94.25 ± 1.765, n=3  |                                            |                    |                        |

Figure 2c

| Mean Clinical Score |         |           | Two-way ANOVA n=10       |                          |         |
|---------------------|---------|-----------|--------------------------|--------------------------|---------|
| dpi                 | STD_MHV | Vit.D_MHV | Fixed effects (type III) | F (DFn, DFd)             | P value |
| 1                   | 0       | 0         | dpi (all time points)    | F (2.242, 10.09) = 96.70 | <0.0001 |
| 2                   | 0       | 0         | diet factor              | F (1, 8) = 464.6         | <0.0001 |
| 3                   | 0.8     | 0.2       | dpi x diet factor        | F (12, 54) = 48.74       | <0.0001 |
| 4                   | 3.2     | 1         |                          |                          |         |
| 5                   | 6.6     | 2         |                          |                          |         |
| 6                   | 11.8    | 3.4       |                          |                          |         |
| 7                   | 15      | 6         |                          |                          |         |
| 8                   | 15      | 7         |                          |                          |         |
| 9                   | 15      | 3.5       |                          |                          |         |
| 10                  | 15      | 0.5       |                          |                          |         |
| 11                  | 15      | 0         |                          |                          |         |
| 12                  | 15      | 0         |                          |                          |         |
| 13                  | 15      | 0         |                          |                          |         |
| 14                  | 15      | 0         |                          |                          |         |

Figure 2d

| Survival Analysis    |       |          |            |         |           | Log-rank (Mantel-Cox) test                      |       |         |
|----------------------|-------|----------|------------|---------|-----------|-------------------------------------------------|-------|---------|
| Biological replicate | d.p.i | Mock STD | Mock Vit.D | MHV STD | MHV Vit.D | Median survival                                 | d.p.i |         |
| #1                   | 14    | 0        |            |         |           | MHV STD                                         | 6     |         |
| #2                   | 14    | 0        |            |         |           | MHV Vit.D3                                      | 8     |         |
| #3                   | 14    | 0        |            |         |           | Chi square                                      | df    | P value |
| #4                   | 14    | 0        |            |         |           | 10.7                                            | 1     | 0.0011  |
| #5                   | 14    | 0        |            |         |           | Mock groups were not considered in the analysis |       |         |
| #1                   | 14    |          | 0          |         |           |                                                 |       |         |
| #2                   | 14    |          | 0          |         |           |                                                 |       |         |
| #3                   | 14    |          | 0          |         |           |                                                 |       |         |
| #4                   | 14    |          | 0          |         |           |                                                 |       |         |
| #5                   | 14    |          | 0          |         |           |                                                 |       |         |
| #1                   | 5     |          |            | 1       |           |                                                 |       |         |
| #2                   | 5     |          |            | 1       |           |                                                 |       |         |
| #3                   | 6     |          |            | 1       |           |                                                 |       |         |
| #4                   | 6     |          |            | 1       |           |                                                 |       |         |
| #5                   | 6     |          |            | 1       |           |                                                 |       |         |
| #6                   | 5     |          |            | 1       |           |                                                 |       |         |
| #7                   | 6     |          |            | 1       |           |                                                 |       |         |
| #8                   | 6     |          |            | 1       |           |                                                 |       |         |
| #9                   | 6     |          |            | 1       |           |                                                 |       |         |
| #10                  | 6     |          |            | 1       |           |                                                 |       |         |
| #1                   | 5     |          |            |         | 1         |                                                 |       |         |
| #2                   | 6     |          |            |         | 1         |                                                 |       |         |
| #3                   | 14    |          |            |         | 0         |                                                 |       |         |
| #4                   | 14    |          |            |         | 0         |                                                 |       |         |
| #5                   | 8     |          |            |         | 1         |                                                 |       |         |
| #6                   | 7     |          |            |         | 1         |                                                 |       |         |
| #7                   | 8     |          |            |         | 1         |                                                 |       |         |
| #8                   | 8     |          |            |         | 1         |                                                 |       |         |
| #9                   | 10    |          |            |         | 1         |                                                 |       |         |
| #10                  | 14    |          |            |         | 0         |                                                 |       |         |

Legend: 0: survived ; 1: dead.

Figure 2e

| Figure 2e | Body temperature (mean °C) |               |                             |               |
|-----------|----------------------------|---------------|-----------------------------|---------------|
|           | STD group                  |               | vit.D group                 |               |
|           | Baseline                   | 3dpi          | Baseline                    | 3dpi          |
|           | 36.9                       | 38.8          | 36.4                        | 37.8          |
|           | 37.1                       | 38.2          | 37.1                        | 37.7          |
|           | 36.4                       | 38.2          | 36.6                        | 37.5          |
|           | 36.5                       | 38.1          | 36.4                        | 37.5          |
|           | 36.9                       | 38            | 37.1                        | 37.3          |
|           | 36.1                       | 37.9          | 36.8                        | 37.2          |
|           | 36.1                       | 37.6          | 36.5                        | 37.1          |
|           | 36.6                       | 37.6          | 36.2                        | 37            |
|           | 36.3                       | 37.5          | 37.2                        | 36.9          |
|           | 36.5                       | 37.4          | 36.9                        | 36.7          |
| Mean      | 36.54                      | 37.93         | 36.72                       | 37.27         |
| S.E.M     | 0.1077                     | 0.1342        | 0.1104                      | 0.1126        |
|           | Paired t test (STD group)  |               | Paired t test (Vit.D group) |               |
|           | P value                    | <0.0001       | P value                     | 0.0107        |
|           | t, df                      | t=11.80, df=9 | t, df                       | t=3.208, df=9 |
|           | Number of pairs = 10       |               | Number of pairs = 10        |               |

Figure 2f

| MHV-3 load in the plasma (Log10 p.f.u / mL) |       |        |       |  | Mann-Whitney test          |       |     |                    |
|---------------------------------------------|-------|--------|-------|--|----------------------------|-------|-----|--------------------|
| STD                                         |       | Vit.D  |       |  | Group comparison           | Sense | FDR | Individual P Value |
| Mock A                                      | MHV B | Mock C | MHV D |  | Mock STD vs. MHV-3 STD     | A-B   | ND  | ND                 |
| 1.000                                       | 5.000 | 1.000  | 1.000 |  | Mock Vit.D vs. MHV-3 Vit.D | C-D   | ND  | ND                 |
| 1.000                                       | 4.301 | 1.000  | 1.000 |  | MHV-3 STD vs. MHV-3 Vit.D  | B-D   | ND  | 0.0162             |
| 1.000                                       | 4.699 | 1.000  | 1.000 |  | Mock STD vs. Mock Vit.D    | A-C   | ND  | ND                 |
| 1.000                                       | 5.000 | 1.000  | 4.000 |  |                            |       |     |                    |
| 1.000                                       | 5.903 | 1.000  | 1.000 |  |                            |       |     |                    |
| 1.000                                       | 5.301 | 1.000  | 4.602 |  |                            |       |     |                    |
| 1.000                                       | 5.845 | 1.000  | 4.255 |  |                            |       |     |                    |
| 1.000                                       | 4.301 | 1.000  | 5.903 |  |                            |       |     |                    |
| Mean                                        | 1.000 | 5.044  | 1.000 |  |                            |       |     |                    |
| S.E.M                                       | 0.000 | 0.219  | 0.000 |  |                            |       |     |                    |

## Raw data\_Figure 3

|                   |                                         |                                         |             |             |                                                  |                                             |         |                    |                    |
|-------------------|-----------------------------------------|-----------------------------------------|-------------|-------------|--------------------------------------------------|---------------------------------------------|---------|--------------------|--------------------|
| Figure 3a         | Lung MHV-3 load (Log10 p.f.u / g)       |                                         |             |             | Mann-Whitney test                                |                                             |         |                    |                    |
|                   | STD                                     |                                         | Vit.D       |             | Group comparison                                 | Sense                                       | FDR     | Individual P Value |                    |
|                   | Mock_A                                  | MHV_B                                   | Mock_C      | MHV_D       | Mock_STD vs. MHV-3_STD                           | A-B                                         | ND      | ND                 |                    |
|                   | 1.000                                   | 3.600                                   | 1.000       | 1.000       | Mock_Vit.D vs. MHV-3_Vit.D                       | C-D                                         | ND      | ND                 |                    |
|                   | 1.000                                   | 4.000                                   | 1.000       | 3.100       | MHV-3_STD vs. MHV-3_Vit.D                        | B-D                                         | ND      | 0.0079             |                    |
|                   | 1.000                                   | 5.000                                   | 1.000       | 3.000       | Mock_STD vs. Mock_Vit.D                          | A-C                                         | ND      | ND                 |                    |
|                   | 1.000                                   | 4.600                                   | 1.000       | 1.000       |                                                  |                                             |         |                    |                    |
|                   | 1.000                                   | 4.100                                   | 1.000       | 3.000       |                                                  |                                             |         |                    |                    |
| Mean              | 1.000                                   | 4.260                                   | 1.000       | 2.220       |                                                  |                                             |         |                    |                    |
| S.E.M             | 0.000                                   | 0.244                                   | 0.000       | 0.498       |                                                  |                                             |         |                    |                    |
| Figures 3b and 3c |                                         |                                         |             |             |                                                  |                                             |         |                    |                    |
| Experiment group  | Biological Replicate                    | Cell counts x 10 <sup>3</sup> /uL blood |             |             | Neutrophil-to-lymphocyte ratio                   | One-way ANOVA plus Fischer LSD posthoc test |         |                    |                    |
|                   |                                         | WBC                                     | Lymphocytes | Neutrophils |                                                  |                                             |         |                    |                    |
| Mock_STD          | 1                                       | 4.2                                     | 2.1         | 2.1         | 1.0                                              |                                             |         |                    |                    |
|                   | 2                                       | 3.7                                     | 2.4         | 1.3         | 0.5                                              | Whole blood cells (WBC)                     |         |                    |                    |
|                   | 3                                       | 3.7                                     | 2           | 1.7         | 0.9                                              | Group comparison                            | Sense   | FDR                | Individual P Value |
|                   | 4                                       | 3.5                                     | 2.1         | 1.4         | 0.7                                              | Mock_STD vs. MHV-3_STD                      | A-B     | 0.0059             | 0.0019             |
|                   | 5                                       | 4.1                                     | 2.2         | 1.9         | 0.9                                              | Mock_Vit.D vs. MHV-3_Vit.D                  | C-D     | 0.1054             | 0.1004             |
| Mean              |                                         | 3.84                                    | 2.16        | 1.68        | 0.8                                              | MHV-3_STD vs. MHV-3_Vit.D                   | B-D     | 0.1054             | 0.0705             |
| S.E.M             |                                         | 0.1327                                  | 0.06782     | 0.1497      | 0.08944                                          | Mock_STD vs. Mock_Vit.D                     | A-C     | 0.7635             | 0.9696             |
| MHV_STD           | 1                                       | 2.5                                     | 0.7         | 1.8         | 2.6                                              |                                             |         |                    |                    |
|                   | 2                                       | 2.4                                     | 0.8         | 1.6         | 2.0                                              | Lymphocytes                                 |         |                    |                    |
|                   | 3                                       | 1                                       | 0.3         | 0.7         | 2.3                                              | Group comparison                            | Sense   | FDR                | Individual P Value |
|                   | 4                                       | 1.3                                     | 0.4         | 0.9         | 2.3                                              | Mock_STD vs. MHV-3_STD                      | A-B     | <0.0001            | <0.0001            |
|                   | 5                                       | 2.4                                     | 0.6         | 1.8         | 3.0                                              | Mock_Vit.D vs. MHV-3_Vit.D                  | C-D     | 0.0026             | 0.0049             |
| Mean              |                                         | 1.92                                    | 0.56        | 1.36        | 2.44                                             | MHV-3_STD vs. MHV-3_Vit.D                   | B-D     | 0.0092             | 0.0263             |
| S.E.M             |                                         | 0.3184                                  | 0.09274     | 0.2337      | 0.1691                                           | Mock_STD vs. Mock_Vit.D                     | A-C     | 0.2072             | 0.7892             |
| Mock_Vit.D        | 1                                       | 3.1                                     | 1.9         | 1.2         | 0.6                                              |                                             |         |                    |                    |
|                   | 2                                       | 2.7                                     | 1.6         | 1.1         | 0.7                                              | Neutrophils                                 |         |                    |                    |
|                   | 3                                       | 4.3                                     | 2.3         | 2           | 0.9                                              | Group comparison                            | Sense   | FDR                | Individual P Value |
|                   | 4                                       | 5                                       | 3.4         | 1.6         | 0.5                                              | Mock_STD vs. MHV-3_STD                      | A-B     | 0.76               | 0.2993             |
|                   | 5                                       | 4                                       | 2           | 2           | 1.0                                              | Mock_Vit.D vs. MHV-3_Vit.D                  | C-D     | 0.8853             | 0.8431             |
| Mean              |                                         | 3.82                                    | 2.24        | 1.58        | 0.74                                             | MHV-3_STD vs. MHV-3_Vit.D                   | B-D     | 0.76               | 0.3619             |
| S.E.M             |                                         | 0.414                                   | 0.3108      | 0.1908      | 0.09274                                          | Mock_STD vs. Mock_Vit.D                     | A-C     | 0.8853             | 0.7418             |
| MHV_Vit.D         | 1                                       | 3.2                                     | 1.4         | 1.8         | 1.3                                              |                                             |         |                    |                    |
|                   | 2                                       | 1.4                                     | 0.6         | 0.8         | 1.3                                              | Neutrophil-to-lymphocyte ratio (NRL)        |         |                    |                    |
|                   | 3                                       | 2.2                                     | 0.8         | 1.4         | 1.8                                              | Group comparison                            | Sense   | FDR                | Individual P Value |
|                   | 4                                       | 3.8                                     | 1.9         | 1.9         | 1.0                                              | Mock_STD vs. MHV-3_STD                      | A-B     | <0.0001            | <0.0001            |
|                   | 5                                       | 4                                       | 1.7         | 2.3         | 1.4                                              | Mock_Vit.D vs. MHV-3_Vit.D                  | C-D     | 0.0008             | 0.0024             |
| Mean              |                                         | 2.92                                    | 1.28        | 1.64        | 1.36                                             | MHV-3_STD vs. MHV-3_Vit.D                   | B-D     | <0.0001            | <0.0001            |
| S.E.M             |                                         | 0.4923                                  | 0.2518      | 0.2542      | 0.1288                                           | Mock_STD vs. Mock_Vit.D                     | A-C     | 0.1999             | 0.7616             |
| Figure 3d         | CD45+ Leukocytes in Lungs (cells / mm2) |                                         |             |             | One-way ANOVA plus Fischer LSD posthoc test      |                                             |         |                    |                    |
|                   | STD                                     |                                         | Vit.D       |             | Group comparison                                 | Sense                                       | FDR     | Individual P Value |                    |
|                   | Mock_A                                  | MHV_B                                   | Mock_C      | MHV_D       | Mock_STD vs. MHV-3_STD                           | A-B                                         | <0.0001 | <0.0001            |                    |
|                   | 180                                     | 1280                                    | 340         | 560         | Mock_Vit.D vs. MHV-3_Vit.D                       | C-D                                         | 0.0928  | 0.1326             |                    |
|                   | 150                                     | 2310                                    | 580         | 320         | MHV-3_STD vs. MHV-3_Vit.D                        | B-D                                         | 0.0007  | 0.0006             |                    |
|                   | 410                                     | 1760                                    | 260         | 1550        | Mock_STD vs. Mock_Vit.D                          | A-C                                         | 0.5193  | 0.9891             |                    |
|                   | 180                                     | 3130                                    | 330         | 840         |                                                  |                                             |         |                    |                    |
|                   | 700                                     | 1560                                    | 130         | 660         |                                                  |                                             |         |                    |                    |
| Mean              | 324.000                                 | 2008.000                                | 328.000     | 786.000     |                                                  |                                             |         |                    |                    |
| S.E.M             | 105.000                                 | 327.300                                 | 73.310      | 208.700     |                                                  |                                             |         |                    |                    |
| Figure 3g         | Mean lung injury score                  |                                         |             |             | Kruskal-Wallis test plus uncorrected Dunn's test |                                             |         |                    |                    |
|                   | STD                                     |                                         | Vit.D       |             | Group comparison                                 | Sense                                       | FDR     | Individual P Value |                    |
|                   | Mock_A                                  | MHV_B                                   | Mock_C      | MHV_D       | Mock_STD vs. MHV-3_STD                           | A-B                                         | 0.0017  | 0.0006             |                    |
|                   | 2.000                                   | 9.000                                   | 2.000       | 2.000       | Mock_Vit.D vs. MHV-3_Vit.D                       | C-D                                         | 0.4423  | 0.5617             |                    |
|                   | 1.000                                   | 5.000                                   | 3.000       | 2.000       | MHV-3_STD vs. MHV-3_Vit.D                        | B-D                                         | 0.0784  | 0.0498             |                    |
|                   | 1.000                                   | 7.000                                   | 2.000       | 3.000       | Mock_STD vs. Mock_Vit.D                          | A-C                                         | 0.3799  | 0.3618             |                    |
|                   | 1.000                                   | 6.000                                   | 1.000       | 1.000       |                                                  |                                             |         |                    |                    |
|                   | 1.000                                   | 3.000                                   | 1.000       | 3.000       |                                                  |                                             |         |                    |                    |
| Mean              | 1.200                                   | 6.000                                   | 1.800       | 2.200       |                                                  |                                             |         |                    |                    |
| S.E.M             | 0.200                                   | 1.000                                   | 0.374       | 0.374       |                                                  |                                             |         |                    |                    |

| Figure 3h | Caspase3+ cells in Lungs (cells / mm2) |        |         |        | One-way ANOVA plus Fischer LSD posthoc test |       |         |                    |
|-----------|----------------------------------------|--------|---------|--------|---------------------------------------------|-------|---------|--------------------|
|           | STD                                    |        | Vit.D   |        | Group comparison                            | Sense | FDR     | Individual P Value |
|           | Mock_A                                 | MHV_B  | Mock_C  | MHV_D  | Mock_STD vs. MHV-3_STD                      | A-B   | <0.0001 | <0.0001            |
|           | 20                                     | 230    | 40      | 70     | Mock_Vit.D vs. MHV-3_Vit.D                  | C-D   | 0.0098  | 0.0281             |
|           | 40                                     | 190    | 60      | 130    | MHV-3_STD vs. MHV-3_Vit.D                   | B-D   | <0.0001 | <0.0001            |
|           | 20                                     | 130    | 20      | 110    | Mock_STD vs. Mock_Vit.D                     | A-C   | 0.1411  | 0.5377             |
|           | 50                                     | 220    | 30      | 80     |                                             |       |         |                    |
|           | 10                                     | 150    | 50      | 40     |                                             |       |         |                    |
|           | Mean                                   | 28.000 | 184.000 | 40.000 | 86.000                                      |       |         |                    |
|           | S.E.M                                  | 7.348  | 19.390  | 7.071  | 15.680                                      |       |         |                    |

# Raw data\_Figure 4

|          |                             |        |        |        |                                             |       |         |                    |
|----------|-----------------------------|--------|--------|--------|---------------------------------------------|-------|---------|--------------------|
| Figure 4 | TNF (ng/Lung g-1)           |        |        |        | One-way ANOVA plus Fischer LSD posthoc test |       |         |                    |
|          | STD                         |        | Vit.D  |        | Group comparison                            | Sense | FDR     | Individual P Value |
|          | Mock_A                      | MHV_B  | Mock_C | MHV_D  | Mock_STD vs. MHV-3_STD                      | A-B   | <0.0001 | <0.0001            |
|          | 9.763                       | 19.491 | 6.123  | 10.731 | Mock_Vit.D vs. MHV-3_Vit.D                  | C-D   | 0.0093  | 0.0265             |
|          | 8.603                       | 19.334 | 6.602  | 11.009 | MHV-3_STD vs. MHV-3_Vit.D                   | B-D   | <0.0001 | <0.0001            |
|          | 8.292                       | 19.928 | 8.267  | 9.535  | Mock_STD vs. Mock_Vit.D                     | A-C   | 0.0615  | 0.2341             |
|          | 9.227                       | 12.030 | 8.707  | 12.789 |                                             |       |         |                    |
|          | 9.199                       | 18.256 | 7.800  | 8.425  |                                             |       |         |                    |
|          | Mean                        | 9.017  | 17.810 | 7.500  |                                             |       |         |                    |
|          | S.E.M                       | 0.258  | 1.470  | 0.492  | 0.734                                       |       |         |                    |
|          | IL-6 (ng/Lung g-1)          |        |        |        | One-way ANOVA plus Fischer LSD posthoc test |       |         |                    |
|          | STD                         |        | Vit.D  |        | Group comparison                            | Sense | FDR     | Individual P Value |
|          | Mock_A                      | MHV_B  | Mock_C | MHV_D  | Mock_STD vs. MHV-3_STD                      | A-B   | 0.0003  | 0.0003             |
|          | 8.585                       | 35.432 | 3.207  | 5.785  | Mock_Vit.D vs. MHV-3_Vit.D                  | C-D   | 0.4087  | 0.7786             |
|          | 5.341                       | 41.751 | 4.137  | 5.489  | MHV-3_STD vs. MHV-3_Vit.D                   | B-D   | 0.0003  | 0.0003             |
|          | 5.267                       | 16.689 | 5.816  | 6.239  | Mock_STD vs. Mock_Vit.D                     | A-C   | 0.4087  | 0.7691             |
|          | 4.971                       | 8.373  | 5.013  | 4.897  |                                             |       |         |                    |
|          | 5.753                       | 41.455 | 4.464  | 7.201  |                                             |       |         |                    |
|          | Mean                        | 5.983  | 28.740 | 4.527  | 5.922                                       |       |         |                    |
|          | S.E.M                       | 0.662  | 6.840  | 0.436  | 0.387                                       |       |         |                    |
|          | IL-1 $\beta$ (ng/Lung g-1)  |        |        |        | One-way ANOVA plus Fischer LSD posthoc test |       |         |                    |
|          | STD                         |        | Vit.D  |        | Group comparison                            | Sense | FDR     | Individual P Value |
|          | Mock_A                      | MHV_B  | Mock_C | MHV_D  | Mock_STD vs. MHV-3_STD                      | A-B   | <0.0001 | <0.0001            |
|          | 8.132                       | 18.389 | 4.220  | 7.681  | Mock_Vit.D vs. MHV-3_Vit.D                  | C-D   | 0.3484  | 0.4977             |
|          | 6.215                       | 29.413 | 4.827  | 8.608  | MHV-3_STD vs. MHV-3_Vit.D                   | B-D   | <0.0001 | <0.0001            |
|          | 5.948                       | 15.632 | 4.312  | 7.958  | Mock_STD vs. Mock_Vit.D                     | A-C   | 0.4211  | 0.8021             |
|          | 5.608                       | 11.627 | 6.341  | 5.720  |                                             |       |         |                    |
|          | 3.356                       | 29.156 | 6.157  | 5.157  |                                             |       |         |                    |
|          | Mean                        | 5.852  | 20.840 | 5.171  | 7.025                                       |       |         |                    |
|          | S.E.M                       | 0.763  | 3.610  | 0.453  | 0.671                                       |       |         |                    |
|          | IFN- $\gamma$ (ng/Lung g-1) |        |        |        | One-way ANOVA plus Fischer LSD posthoc test |       |         |                    |
|          | STD                         |        | Vit.D  |        | Group comparison                            | Sense | FDR     | Individual P Value |
|          | Mock_A                      | MHV_B  | Mock_C | MHV_D  | Mock_STD vs. MHV-3_STD                      | A-B   | <0.0001 | <0.0001            |
|          | 2.947                       | 18.414 | 0.933  | 3.569  | Mock_Vit.D vs. MHV-3_Vit.D                  | C-D   | 0.2698  | 0.3854             |
|          | 2.153                       | 17.940 | 1.332  | 4.561  | MHV-3_STD vs. MHV-3_Vit.D                   | B-D   | <0.0001 | <0.0001            |
|          | 1.440                       | 12.277 | 1.350  | 4.263  | Mock_STD vs. Mock_Vit.D                     | A-C   | 0.456   | 0.8686             |
|          | 1.184                       | 6.487  | 1.766  | 2.075  |                                             |       |         |                    |
|          | 1.086                       | 25.141 | 1.527  | 2.537  |                                             |       |         |                    |
|          | Mean                        | 1.762  | 16.050 | 1.381  | 3.401                                       |       |         |                    |
|          | S.E.M                       | 0.350  | 3.142  | 0.137  | 0.481                                       |       |         |                    |



Raw data\_Figure 5

|          |          |       |        |       |                                             |       |         |                    |
|----------|----------|-------|--------|-------|---------------------------------------------|-------|---------|--------------------|
| Figure 5 | lsg20    |       |        |       | One-way ANOVA plus Fischer LSD posthoc test |       |         |                    |
|          | STD      |       | Vit.D  |       | Group comparison                            | Sense | FDR     | Individual P Value |
|          | Mock_A   | MHV_B | Mock_C | MHV_D | Mock_STD vs. MHV-3_STD                      | A-B   | 0.0213  | 0.0203             |
|          | 0.917    | 1.689 | 1.294  | 3.156 | Mock_Vit.D vs. MHV-3_Vit.D                  | C-D   | 0.002   | 0.0009             |
|          | 1.297    | 1.347 | 0.936  | 4.548 | MHV-3_STD vs. MHV-3_Vit.D                   | B-D   | 0.0276  | 0.0394             |
|          | 1.181    | 3.274 | 1.557  | 3.000 | Mock_STD vs. Mock_Vit.D                     | A-C   | 0.2842  | 0.5414             |
|          | 0.604    | 2.627 | 1.373  | 2.501 |                                             |       |         |                    |
| Mean FC  | 1.000    | 2.234 | 1.290  | 3.301 |                                             |       |         |                    |
| S.E.M    | 0.154    | 0.440 | 0.130  | 0.439 |                                             |       |         |                    |
|          | lsg15    |       |        |       | One-way ANOVA plus Fischer LSD posthoc test |       |         |                    |
|          | STD      |       | Vit.D  |       | Group comparison                            | Sense | FDR     | Individual P Value |
|          | Mock_A   | MHV_B | Mock_C | MHV_D | Mock_STD vs. MHV-3_STD                      | A-B   | 0.4267  | 0.3048             |
|          | 0.623    | 1.229 | 0.961  | 1.165 | Mock_Vit.D vs. MHV-3_Vit.D                  | C-D   | 0.0554  | 0.0132             |
|          | 1.120    | 1.112 | 1.094  | 1.465 | MHV-3_STD vs. MHV-3_Vit.D                   | B-D   | 0.181   | 0.0862             |
|          | 0.950    | 1.227 | 1.238  | 1.528 | Mock_STD vs. Mock_Vit.D                     | A-C   | >0.9999 | 0.972              |
|          | 1.305    | 1.058 | 0.726  | 1.563 |                                             |       |         |                    |
| Mean FC  | 1.000    | 1.157 | 1.005  | 1.430 |                                             |       |         |                    |
| S.E.M    | 0.145    | 0.043 | 0.109  | 0.091 |                                             |       |         |                    |
|          | Ifn1b    |       |        |       | One-way ANOVA plus Fischer LSD posthoc test |       |         |                    |
|          | STD      |       | Vit.D  |       | Group comparison                            | Sense | FDR     | Individual P Value |
|          | Mock_A   | MHV_B | Mock_C | MHV_D | Mock_STD vs. MHV-3_STD                      | A-B   | 0.3951  | 0.3763             |
|          | 0.992    | 1.104 | 1.112  | 2.369 | Mock_Vit.D vs. MHV-3_Vit.D                  | C-D   | 0.0258  | 0.0082             |
|          | 1.097    | 1.546 | 0.779  | 1.441 | MHV-3_STD vs. MHV-3_Vit.D                   | B-D   | 0.0619  | 0.0393             |
|          | 1.080    | 1.116 | 1.296  | 1.493 | Mock_STD vs. Mock_Vit.D                     | A-C   | 0.7452  | 0.9463             |
|          | 0.831    | 0.998 | 0.870  | 1.386 |                                             |       |         |                    |
| Mean FC  | 1.000    | 1.191 | 1.014  | 1.672 |                                             |       |         |                    |
| S.E.M    | 0.061    | 0.121 | 0.117  | 0.233 |                                             |       |         |                    |
|          | Ceacam 1 |       |        |       | One-way ANOVA plus Fischer LSD posthoc test |       |         |                    |
|          | STD      |       | Vit.D  |       | Group comparison                            | Sense | FDR     | Individual P Value |
|          | Mock_A   | MHV_B | Mock_C | MHV_D | Mock_STD vs. MHV-3_STD                      | A-B   | 0.6751  | 0.643              |
|          | 0.793    | 1.226 | 0.529  | 1.246 | Mock_Vit.D vs. MHV-3_Vit.D                  | C-D   | 0.6751  | 0.5404             |
|          | 1.292    | 0.805 | 0.968  | 0.548 | MHV-3_STD vs. MHV-3_Vit.D                   | B-D   | 0.6751  | 0.6307             |
|          | 0.714    | 0.963 | 0.878  | 1.066 | Mock_STD vs. Mock_Vit.D                     | A-C   | 0.6751  | 0.5517             |
|          | 1.199    | 0.629 | 1.140  | 1.152 |                                             |       |         |                    |
| Mean FC  | 1.000    | 0.906 | 0.879  | 1.003 |                                             |       |         |                    |
| S.E.M    | 0.144    | 0.127 | 0.129  | 0.156 |                                             |       |         |                    |
|          | Def1     |       |        |       | One-way ANOVA plus Fischer LSD posthoc test |       |         |                    |
|          | STD      |       | Vit.D  |       | Group comparison                            | Sense | FDR     | Individual P Value |
|          | Mock_A   | MHV_B | Mock_C | MHV_D | Mock_STD vs. MHV-3_STD                      | A-B   | 0.9258  | 0.6613             |
|          | 0.882    | 1.087 | 1.036  | 1.067 | Mock_Vit.D vs. MHV-3_Vit.D                  | C-D   | 0.9308  | 0.8865             |
|          | 1.024    | 0.780 | 1.137  | 1.236 | MHV-3_STD vs. MHV-3_Vit.D                   | B-D   | 0.5633  | 0.2682             |
|          | 0.996    | 1.236 | 1.274  | 1.130 | Mock_STD vs. Mock_Vit.D                     | A-C   | 0.4391  | 0.1045             |
|          | 1.099    | 1.052 | 1.156  | 1.120 |                                             |       |         |                    |
| Mean FC  | 1.000    | 1.039 | 1.151  | 1.138 |                                             |       |         |                    |
| S.E.M    | 0.045    | 0.095 | 0.049  | 0.035 |                                             |       |         |                    |

## Raw data\_Figure 6

| Figure 3a | Mean Liver injury score |       |        |       | Kruskal-Wallis test plus uncorrected Dunn's test |       |        |                    |
|-----------|-------------------------|-------|--------|-------|--------------------------------------------------|-------|--------|--------------------|
|           | STD                     |       | Vit.D  |       | Group comparison                                 | Sense | FDR    | Individual P Value |
|           | Mock_A                  | MHV_B | Mock_C | MHV_D | Mock_STD vs. MHV-3_STD                           | A-B   | 0.0036 | 0.0017             |
|           | 2.000                   | 5.000 | 1.000  | 7.000 | Mock_Vit.D vs. MHV-3_Vit.D                       | C-D   | 0.0217 | 0.0206             |
|           | 1.000                   | 8.000 | 1.000  | 5.000 | MHV-3_STD vs. MHV-3_Vit.D                        | B-D   | 0.1932 | 0.276              |
|           | 2.000                   | 7.000 | 2.000  | 4.000 | Mock_STD vs. Mock_Vit.D                          | A-C   | 0.4123 | 0.7854             |
|           | 1.000                   | 7.000 | 2.000  | 4.000 |                                                  |       |        |                    |
|           | 2.000                   | 9.000 | 1.000  | 4.000 |                                                  |       |        |                    |
| Mean      | 1.600                   | 7.200 | 1.400  | 4.800 |                                                  |       |        |                    |
| S.E.M     | 0.245                   | 0.663 | 0.245  | 0.583 |                                                  |       |        |                    |

| Figure 3d | Mean Liver injury score |       |        |       | Kruskal-Wallis test plus uncorrected Dunn's test |       |        |                    |
|-----------|-------------------------|-------|--------|-------|--------------------------------------------------|-------|--------|--------------------|
|           | STD                     |       | Vit.D  |       | Group comparison                                 | Sense | FDR    | Individual P Value |
|           | Mock_A                  | MHV_B | Mock_C | MHV_D | Mock_STD vs. MHV-3_STD                           | A-B   | 0.0036 | 0.0017             |
|           | 2.000                   | 5.000 | 1.000  | 7.000 | Mock_Vit.D vs. MHV-3_Vit.D                       | C-D   | 0.0217 | 0.0206             |
|           | 1.000                   | 8.000 | 1.000  | 5.000 | MHV-3_STD vs. MHV-3_Vit.D                        | B-D   | 0.1932 | 0.276              |
|           | 2.000                   | 7.000 | 2.000  | 4.000 | Mock_STD vs. Mock_Vit.D                          | A-C   | 0.4123 | 0.7854             |
|           | 1.000                   | 7.000 | 2.000  | 4.000 |                                                  |       |        |                    |
|           | 2.000                   | 9.000 | 1.000  | 4.000 |                                                  |       |        |                    |
| Mean      | 1.600                   | 7.200 | 1.400  | 4.800 |                                                  |       |        |                    |
| S.E.M     | 0.245                   | 0.663 | 0.245  | 0.583 |                                                  |       |        |                    |
